# Supplementary material
Source: ML conference proceedings conference paper supplement (https://proceedings.neurips.cc/paper_files/paper/2009/hash/c399862d3b9d6b76c8436e924a68c45b-Abstract.html)
Supplement: Supplementary file 1 [file c399862d3b9d6b76c8436e924a68c45b-Supplemental.zip]

# Supplementary material for “Nash Equilibria of Static Prediction Games”

## A Proof of Theorem 2

*Proof.* Equation 20 defines the Nikaido-Isoda function. Intuitively,  $\Psi(\mathbf{a}, \mathbf{b})$  quantifies the sum of the relative cost savings that the players can enjoy by changing from strategy  $\mathbf{a}_v$  to strategy  $\mathbf{b}_v$  while their opponent continues to play  $\mathbf{a}_{-v}$ . Equation 21 defines the value function  $V(\mathbf{a})$  as the sum of greatest possible cost savings attainable by changing from  $\mathbf{a}$  to any strategy unilaterally.

$$\Psi(\mathbf{a}, \mathbf{b}) = \sum_{v \in \{+1, -1\}} \theta_v(\mathbf{a}_v, \mathbf{a}_{-v}) - \theta_v(\mathbf{b}_v, \mathbf{a}_{-v}) \quad (20)$$

$$V(\mathbf{a}) = \max_{\mathbf{b} \in A} \Psi(\mathbf{a}, \mathbf{b}) \quad (21)$$

Equivalently to Equation 2, a Nash equilibrium can be characterized as minimizer of the value function  $\mathbf{a}^* = \arg \min_{\mathbf{a}} V(\mathbf{a})$  with  $V(\mathbf{a}^*) = 0$ . Note, that the value function is always non-negative and that  $V(\mathbf{a}^*) = 0$  if and only if  $\mathbf{a}^*$  is a Nash equilibrium.

We will now show that  $V$  reaches zero at the minimax solution of the joint cost function  $\theta_0$ . Inserting Equations 15 and 16 into Equation 22 gives Equation 23. Since  $\ell_{-1} = -\ell_{+1}$ , two of the originally four sums over the examples have canceled each other out. Equation 23 can be written in terms of the joint cost function introduced in Equation 17.

$$\Psi(\mathbf{a}, \mathbf{b}) = \sum_{v \in \{+1, -1\}} \theta_v(\mathbf{a}_v, \mathbf{a}_{-v}) - \theta_v(\mathbf{b}_v, \mathbf{a}_{-v}) \quad (22)$$

$$\begin{aligned} &= \sum_{i=1}^n \ell_{+1}(h_{\mathbf{a}_{+1}}(\phi_{\mathbf{b}_{-1}}(\mathbf{X})_i), y_i) + \Omega_{\mathbf{a}_{+1}} - \Omega_{\mathbf{b}_{-1}} \\ &\quad - \sum_{i=1}^n \ell_{+1}(h_{\mathbf{b}_{+1}}(\phi_{\mathbf{a}_{-1}}(\mathbf{X})_i), y_i) - \Omega_{\mathbf{b}_{+1}} + \Omega_{\mathbf{a}_{-1}} \end{aligned} \quad (23)$$

$$= \theta_0(\mathbf{a}_{+1}, \mathbf{b}_{-1}) - \theta_0(\mathbf{b}_{+1}, \mathbf{a}_{-1}) \quad (24)$$

A Nash equilibrium is a minimum (over  $\mathbf{a}$ ) of value function  $V$  that is in turn the maximum (over  $\mathbf{b}$ ) of the Nikaido-Isoda function  $\Psi$  (Equation 25). We then exploit Equation 24. As each of the  $\theta_0$  terms depends on two independent pairs of parameters, we can rearrange the max and min expressions as in Equation 28.

$$\Psi([\mathbf{a}_{+1}^*, \mathbf{a}_{-1}^*], [\mathbf{b}_{+1}^*, \mathbf{b}_{-1}^*]) = \min_{\mathbf{a}_{+1}, \mathbf{a}_{-1}} \max_{\mathbf{b}_{+1}, \mathbf{b}_{-1}} \Psi([\mathbf{a}_{+1}, \mathbf{a}_{-1}], [\mathbf{b}_{+1}, \mathbf{b}_{-1}]) \quad (25)$$

$$= \min_{\mathbf{a}_{+1}, \mathbf{a}_{-1}} \left( \max_{\mathbf{b}_{-1}} \theta_0(\mathbf{a}_{+1}, \mathbf{b}_{-1}) + \max_{\mathbf{b}_{+1}} -\theta_0(\mathbf{b}_{+1}, \mathbf{a}_{-1}) \right) \quad (26)$$

$$= \min_{\mathbf{a}_{+1}} \max_{\mathbf{b}_{-1}} \theta_0(\mathbf{a}_{+1}, \mathbf{b}_{-1}) + \min_{\mathbf{a}_{-1}} \max_{\mathbf{b}_{+1}} -\theta_0(\mathbf{b}_{+1}, \mathbf{a}_{-1}) \quad (27)$$

$$= \min_{\mathbf{a}_{+1}} \max_{\mathbf{b}_{-1}} \theta_0(\mathbf{a}_{+1}, \mathbf{b}_{-1}) - \max_{\mathbf{a}_{-1}} \min_{\mathbf{b}_{+1}} \theta_0(\mathbf{b}_{+1}, \mathbf{a}_{-1}) \quad (28)$$

As the two summands of Equation 28 are optimization terms over distinct pairs of parameters, two sub-problems can be solved independently:

$$\theta_0(\mathbf{a}_{+1}^*, \mathbf{b}_{-1}^*) = \min_{\mathbf{a}_{+1}} \max_{\mathbf{b}_{-1}} \theta_0(\mathbf{a}_{+1}, \mathbf{b}_{-1}), \quad (29)$$

$$\theta_0(\mathbf{b}_{+1}^*, \mathbf{a}_{-1}^*) = \max_{\mathbf{a}_{-1}} \min_{\mathbf{b}_{+1}} \theta_0(\mathbf{b}_{+1}, \mathbf{a}_{-1}). \quad (30)$$

If  $\mathbf{a}^*$  is a Nash equilibrium, then  $V(\mathbf{a}^*) = \max_{\mathbf{b}} \Psi(\mathbf{a}^*, \mathbf{b}) = 0$ . Any  $\mathbf{b}^* = \arg \max_{\mathbf{b}} \Psi(\mathbf{a}^*, \mathbf{b})$  would furthermore constitute an additional Nash equilibrium. Therefore, if the game has a *unique* Nash equilibrium  $\mathbf{a}^*$ , it follows that  $\mathbf{b}^* = \mathbf{a}^*$  and consequently, Equation 29 reduces to  $[\mathbf{a}_{+1}^*, \mathbf{a}_{-1}^*] = \arg \min_{\mathbf{a}_{+1}} \max_{\mathbf{a}_{-1}} \theta_0(\mathbf{a}_{+1}, \mathbf{a}_{-1})$ .  $\square$
